# Supplementary material for: Symptoms Prior to Diagnosis of Multiple Sclerosis in Individuals Younger Than 18 Years
Source: PubMed Central journal article supplement (PMC11681376; doi:10.1001/jamanetworkopen.2024.52652), 2024-12-27
Supplement: jamanetwopen-e2452652-s001.pdf [file jamanetwopen-e2452652-s001.pdf]

## Supplementary Online Content

Akmatov MK, Graf J, Kohring C, et al. Symptoms prior to diagnosis of multiple sclerosis in individuals younger than 18 years. *JAMA Netw Open*. 2024;7(12):e2452652.  
doi:10.1001/jamanetworkopen.2024.52652

**eFigure 1.** Data of Pediatric Patients With Newly Diagnosed Multiple Sclerosis (MS) Between 2013 and 2020 Included in the Assessment of Medical Diagnoses Before First Manifestation of MS, With Varying Lengths of Observation Time

**eFigure 2.** Flow Chart Describing Ascertainment of Children and Adolescents With Multiple Sclerosis

**eTable 1.** Description of the 163 *ICD-10-GM* Codes Examined in the Study, Grouped by Chapter

**eTable 2.** Neurological and Cerebrovascular Diagnoses Excluded in the Complementary Analysis

**eTable 3.** Diseases and Symptoms Present More Frequently Among Children and Adolescents With Multiple Sclerosis Before Its Diagnosis as Compared With Controls

This supplementary material has been provided by the authors to give readers additional information about their work.

**eFigure 1. Examples of data presentations of pediatric patients with newly diagnosed multiple sclerosis (MS) between 2013 and 2020 included into the assessment of medical diagnoses before first manifestation of MS with varying lengths of observation time depending on the calendar year of first outpatient visit and the time of first MS/CNS-related demyelinating disease diagnoses**

\* Possible demyelinating events were inflammatory diseases of the CNS (ICD-10 codes G04, G05, G09),

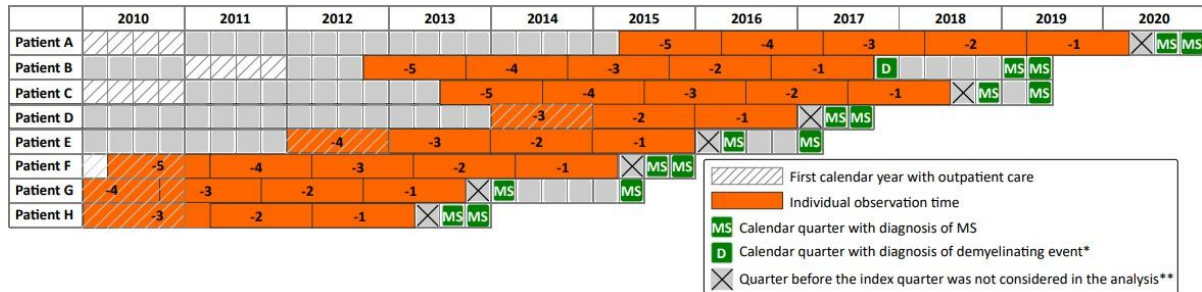

demyelinating diseases of the CNS (G36, G37), disorders of the optic nerve and the visual pathways (H46, H47, H48), and abnormal findings on diagnostic imaging of CNS (R90) <sup>12</sup>.

\*\* Diagnoses made in the last quarter before the index quarter were not considered in the analysis as they may not be interpreted as prodromal features of MS but rather be attributed to MS.

eFigure 2. Flow-chart describing the ascertainment of children/adolescents with multiple sclerosis (MS)

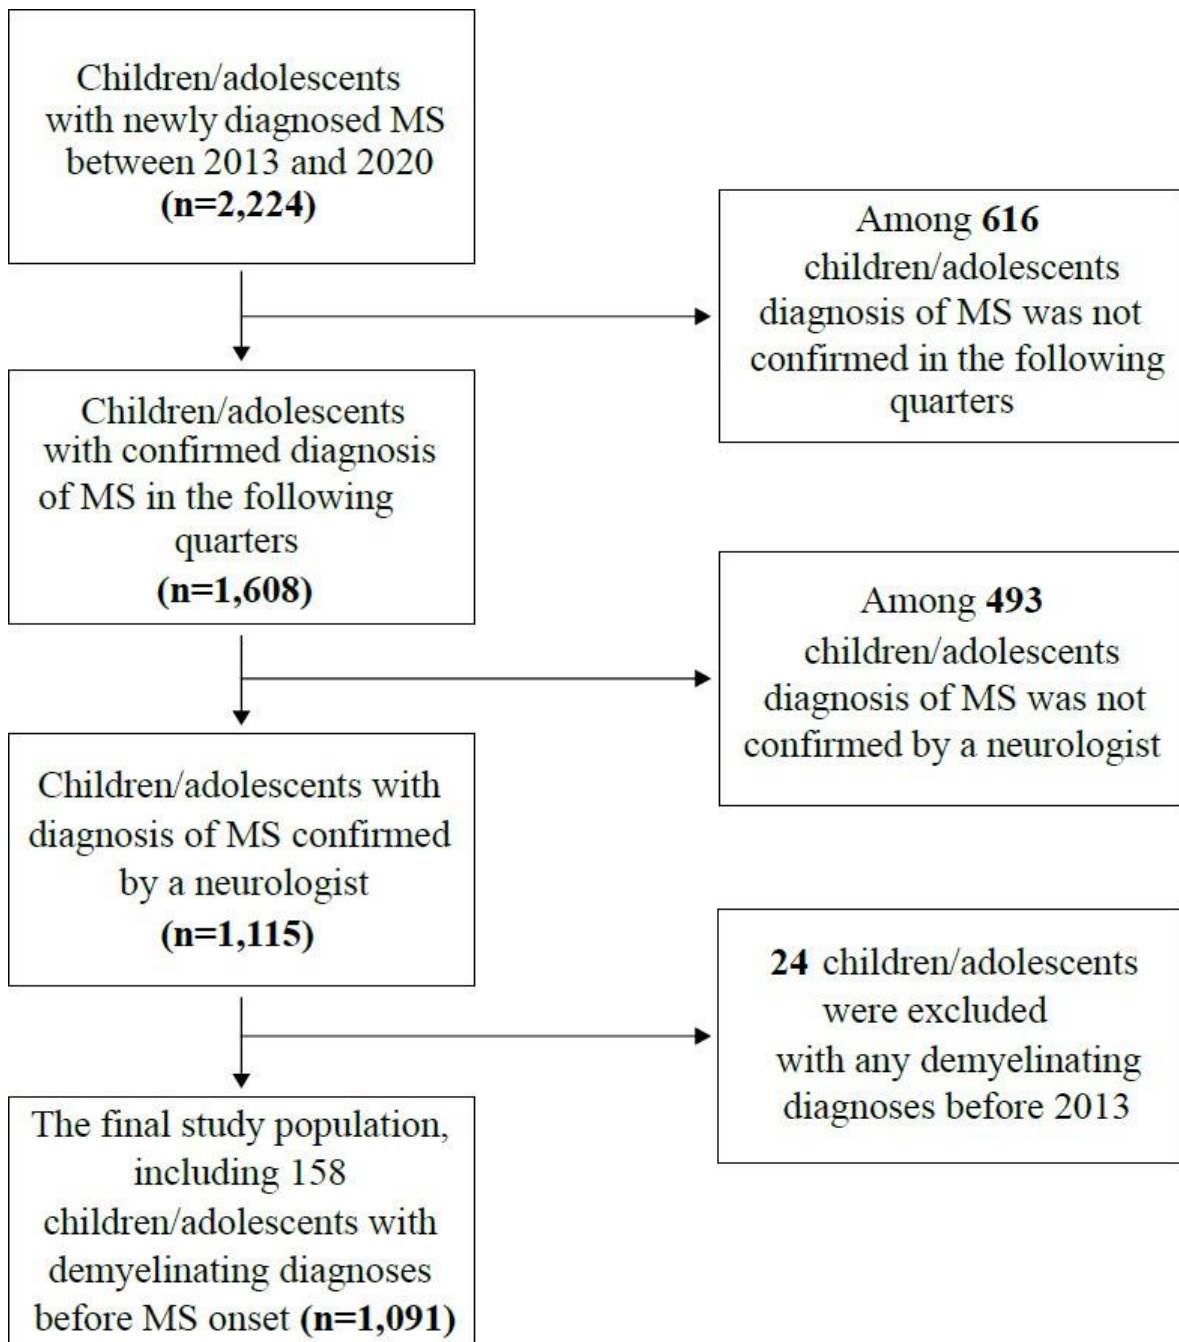

**eTable 1. Description of the one hundred sixty-three ICD-10-GM codes examined in the study grouped by ICD chapter**

| ICD-10-GM chapter                                                                                                                                                                                                                                                                                                | Chapter name                                                                            | ICD-10 code                                                                                             |
|------------------------------------------------------------------------------------------------------------------------------------------------------------------------------------------------------------------------------------------------------------------------------------------------------------------|-----------------------------------------------------------------------------------------|---------------------------------------------------------------------------------------------------------|
| I.                                                                                                                                                                                                                                                                                                               | Infectious and parasitic diseases                                                       | A08, A09, A38, A49, B00, B07, B08, B34, B35, B36, B37, B80, B85, B99                                    |
| II.                                                                                                                                                                                                                                                                                                              | Neoplasms                                                                               | D22                                                                                                     |
| III.                                                                                                                                                                                                                                                                                                             | Diseases of the blood and blood-forming organs                                          | D50                                                                                                     |
| IV.                                                                                                                                                                                                                                                                                                              | Endocrine, nutritional and metabolic diseases                                           | E03, E55, E66                                                                                           |
| V.                                                                                                                                                                                                                                                                                                               | Mental and behavioral disorders                                                         | F32, F41, F43, F45, F80, F81, F90, F91, F93, F98                                                        |
| VI.                                                                                                                                                                                                                                                                                                              | Diseases of the nervous system                                                          | G43, G44, G47                                                                                           |
| VII.                                                                                                                                                                                                                                                                                                             | Diseases of the eye and adnexa                                                          | H00, H04, H10, H35, H50, H52, H53                                                                       |
| VIII.                                                                                                                                                                                                                                                                                                            | Diseases of the ear and mastoid process                                                 | H60, H61, H65, H66, H68, H69, H91, H92, H93                                                             |
| IX.                                                                                                                                                                                                                                                                                                              | Diseases of the circulatory system                                                      | I88, I95, I99                                                                                           |
| X.                                                                                                                                                                                                                                                                                                               | Diseases of the respiratory system                                                      | J00, J01, J02, J03, J04, J06, J11, J18, J20, J22, J30, J31, J32, J34, J35, J40, J44, J45, J98           |
| XI.                                                                                                                                                                                                                                                                                                              | Diseases of the digestive system                                                        | K07, K12, K29, K52, K59                                                                                 |
| XII.                                                                                                                                                                                                                                                                                                             | Diseases of the skin and subcutaneous tissue                                            | L01, L02, L03, L08, L20, L23, L29, L30, L50, L60, L65, L70, L72, L85, L90                               |
| XIII.                                                                                                                                                                                                                                                                                                            | Diseases of the musculoskeletal system and connective tissue                            | M21, M22, M23, M25, M40, M41, M43, M53, M54, M62, M65, M70, M76, M77, M79, M99                          |
| XIV.                                                                                                                                                                                                                                                                                                             | Diseases of the genitourinary system                                                    | N30, N39, N64, N76, N89, N91, N92, N94                                                                  |
| XVII.                                                                                                                                                                                                                                                                                                            | Congenital malformations, deformations and chromosomal abnormalities                    | Q66                                                                                                     |
| XVIII.                                                                                                                                                                                                                                                                                                           | Symptoms, signs and abnormal clinical and laboratory findings, not elsewhere classified | R00, R04, R05, R06, R07, R10, R11, R14, R20, R21, R23, R29, R30, R42, R50, R51, R52, R53, R55, R59, R63 |
| XIX.                                                                                                                                                                                                                                                                                                             | Injury, poisoning and certain other consequences of external causes                     | S00, S20, S30, S50, S52, S60, S61, S63, S80, S83, S90, S93, T14, T78, T79                               |
| XXI.                                                                                                                                                                                                                                                                                                             | Factors influencing health status and contact with health services                      | Z00, Z01, Z23, Z24, Z25, Z26, Z27, Z30, Z46, Z51, Z63, Z71                                              |
| <p>One hundred sixty-three diagnoses with the sufficient sample size (at least 30 children/adolescents) were selected for the analysis. Diagnoses with the number of children/adolescents less than 30 (ie, low prevalent diseases) could not be included in the analysis due to the data protection issues.</p> |                                                                                         |                                                                                                         |

**eTable 2. Neurological and cerebrovascular diagnoses excluded in the complementary analysis**

| <b>Diagnosis name</b>                                                                                                                 | <b>ICD-10-GM code(s)</b> |
|---------------------------------------------------------------------------------------------------------------------------------------|--------------------------|
| diseases of the nervous system                                                                                                        | G00-G99, except G35      |
| cerebrovascular diseases                                                                                                              | I60-I69                  |
| visual disturbances                                                                                                                   | H53                      |
| disorders of vestibular function                                                                                                      | H81                      |
| neuromuscular dysfunction of bladder, not elsewhere classified                                                                        | N31                      |
| disturbances of skin sensation                                                                                                        | R20                      |
| abnormalities of gait and mobility                                                                                                    | R26                      |
| unspecified urinary incontinence                                                                                                      | R32                      |
| other unspecified symptoms and signs involving the urinary system                                                                     | R39                      |
| dizziness and giddiness                                                                                                               | R42                      |
| speech disturbances, not elsewhere classified                                                                                         | R47                      |
| Children/adolescents with these diagnoses were excluded in a complementary analysis as they can be considered early indicators of MS. |                          |

**eTable 3. Diseases/symptoms present more frequently among children/adolescents with multiple sclerosis (MS) before its diagnosis as compared to controls without MS and controls with JIA – results of the logistic regression analyses**

| ICD-10 code | Diagnosis name                                                         | Patients with MS | Controls without MS | MS vs. controls without MS (main analysis) |           |                          | MS vs. controls with JIA (main analysis) |                  | MS vs. controls without MS (complementary analysis) |                  |                          |                  |
|-------------|------------------------------------------------------------------------|------------------|---------------------|--------------------------------------------|-----------|--------------------------|------------------------------------------|------------------|-----------------------------------------------------|------------------|--------------------------|------------------|
|             |                                                                        |                  |                     | Univariable analysis                       |           |                          | Multivariable analysis**                 |                  | Multivariable analysis**                            |                  | Multivariable analysis** |                  |
|             |                                                                        |                  |                     | n                                          | n         | UOR                      | 95% CI                                   | p value*         | AOR                                                 | 95% CI           | AOR                      | 95% CI           |
| A09         | Other gastroenteritis and colitis of infectious and unspecified origin | 267              | 2,088               | 1.37                                       | 1.18-1.58 | 0.004                    | 0.99                                     | 0.84-1.16        | 1.18                                                | 0.83-1.67        | 1.01                     | 0.86-1.18        |
| B34         | Viral infection of unspecified site                                    | 285              | 2,308               | 1.32                                       | 1.14-1.52 | 0.02                     | 1.03                                     | 0.88-1.20        | 1.05                                                | 0.76-1.46        | 1.03                     | 0.89-1.20        |
| E66         | Obesity                                                                | 195              | 1,120               | 1.90                                       | 1.61-2.25 | 6.64 x 10 <sup>-12</sup> | <b>1.70</b>                              | <b>1.42-2.02</b> | <b>3.19</b>                                         | <b>2.03-5.02</b> | <b>1.68</b>              | <b>1.41-1.99</b> |
| F45         | Somatoform disorders                                                   | 149              | 950                 | 1.66                                       | 1.38-2.00 | 1.40 x 10 <sup>-05</sup> | 1.14                                     | 0.93-1.40        | 0.89                                                | 0.59-1.35        | 1.21                     | 0.99-1.47        |
| G44         | Other headache syndromes                                               | 78               | 483                 | 1.66                                       | 1.30-2.13 | 0.009                    | 1.14                                     | 0.87-1.49        | 0.91                                                | 0.52-1.59        | -                        | -                |
| H50         | Other strabismus                                                       | 261              | 1,973               | 1.42                                       | 1.23-1.65 | 0.0004                   | 1.06                                     | 0.90-1.26        | 0.87                                                | 0.62-1.23        | 1.12                     | 0.95-1.33        |
| H52         | Disorders of refraction and accommodation                              | 593              | 4,732               | 1.55                                       | 1.37-1.76 | 7.38 x 10 <sup>-10</sup> | <b>1.26</b>                              | <b>1.09-1.47</b> | <b>3.08</b>                                         | <b>2.33-4.08</b> | <b>1.34</b>              | <b>1.16-1.54</b> |
| H53         | Visual disturbances                                                    | 253              | 1,635               | 1.71                                       | 1.47-1.99 | 3.48 x 10 <sup>-10</sup> | <b>1.31</b>                              | <b>1.10-1.55</b> | <b>1.62</b>                                         | <b>1.13-2.33</b> | -                        | -                |
| J00         | Acute nasopharyngitis [common cold]                                    | 221              | 1,556               | 1.53                                       | 1.31-1.79 | 2.08 x 10 <sup>-05</sup> | 1.16                                     | 0.97-1.37        | 1.46                                                | 0.99-2.13        | 1.18                     | 0.99-1.39        |
| J02         | Acute pharyngitis                                                      | 327              | 2,526               | 1.42                                       | 1.24-1.63 | 8.02 x 10 <sup>-05</sup> | 1.05                                     | 0.90-1.22        | 1.21                                                | 0.88-1.67        | 1.05                     | 0.91-1.22        |
| J03         | Acute tonsillitis                                                      | 345              | 2,626               | 1.46                                       | 1.27-1.67 | 6.72 x 10 <sup>-06</sup> | 1.11                                     | 0.96-1.29        | <b>1.66</b>                                         | <b>1.21-2.28</b> | 1.13                     | 0.98-1.31        |
| J06         | AURI of multiple and unspecified sites                                 | 668              | 5,857               | 1.36                                       | 1.20-1.55 | 0.0003                   | 1.03                                     | 0.89-1.18        | <b>3.59</b>                                         | <b>2.76-4.68</b> | 1.04                     | 0.91-1.19        |
| J32         | Chronic sinusitis                                                      | 151              | 1,027               | 1.55                                       | 1.29-1.86 | 0.0005                   | 1.12                                     | 0.92-1.37        | 1.09                                                | 0.69-1.70        | 1.12                     | 0.92-1.36        |
| J40         | Bronchitis, not specified as acute or chronic                          | 182              | 1,396               | 1.37                                       | 1.15-1.62 | 0.048                    | 1.04                                     | 0.87-1.25        | <b>1.54</b>                                         | <b>1.03-2.30</b> | 1.07                     | 0.90-1.28        |
| K29         | Gastritis and duodenitis                                               | 120              | 687                 | 1.84                                       | 1.50-2.26 | 8.98 x 10 <sup>-07</sup> | <b>1.35</b>                              | <b>1.08-1.70</b> | 1.12                                                | 0.68-1.84        | <b>1.36</b>              | <b>1.09-1.70</b> |
| L70         | Acne                                                                   | 289              | 2,365               | 1.30                                       | 1.13-1.50 | 0.04                     | 1.12                                     | 0.96-1.31        | <b>2.16</b>                                         | <b>1.57-2.96</b> | <b>1.16</b>              | <b>1.00-1.34</b> |
| M22         | Disorders of patella                                                   | 93               | 492                 | 1.97                                       | 1.57-2.49 | 1.30 x 10 <sup>-06</sup> | <b>1.47</b>                              | <b>1.13-1.90</b> | 1.12                                                | 0.68-1.84        | <b>1.44</b>              | <b>1.12-1.86</b> |
| M23         | Internal derangement of knee                                           | 40               | 206                 | 1.98                                       | 1.40-2.79 | 0.02                     | 1.41                                     | 0.96-2.05        | 0.94                                                | 0.47-1.88        | 1.41                     | 0.97-2.04        |
| M25         | Other joint disorders, not elsewhere classified                        | 197              | 1,413               | 1.48                                       | 1.26-1.75 | 0.0004                   | 1.01                                     | 0.84-1.22        | <b>0.40</b>                                         | <b>0.28-0.56</b> | 1.03                     | 0.86-1.23        |
| M54         | Dorsalgia                                                              | 277              | 1,869               | 1.65                                       | 1.42-1.90 | 2.76 x 10 <sup>-09</sup> | 1.13                                     | 0.96-1.33        | 1.10                                                | 0.79-1.52        | <b>1.20</b>              | <b>1.02-1.41</b> |
| M70         | Soft tissue disorders related to use, overuse and pressure             | 31               | 148                 | 2.13                                       | 1.44-3.15 | 0.03                     | 1.45                                     | 0.95-2.22        | 0.77                                                | 0.35-1.69        | 1.43                     | 0.94-2.17        |
| M76         | Enthesopathies of lower limb, excluding foot                           | 55               | 321                 | 1.75                                       | 1.31-2.35 | 0.03                     | 1.34                                     | 0.98-1.83        | 0.72                                                | 0.42-1.23        | 1.32                     | 0.97-1.79        |
| M79         | Other soft tissue disorders, not elsewhere classified                  | 159              | 1,078               | 1.56                                       | 1.30-1.86 | 0.0002                   | 1.06                                     | 0.87-1.29        | <b>0.41</b>                                         | <b>0.29-0.58</b> | 1.13                     | 0.94-1.37        |

|     |                                                 |     |       |       |             |                          |              |                   |              |                    |             |                  |
|-----|-------------------------------------------------|-----|-------|-------|-------------|--------------------------|--------------|-------------------|--------------|--------------------|-------------|------------------|
| M99 | Biomechanical lesions, not elsewhere classified | 192 | 1,290 | 1.59  | 1.35-1.88   | 6.74 x 10 <sup>-06</sup> | 1.18         | 0.98-1.42         | <b>0.65</b>  | <b>0.45-0.93</b>   | <b>1.20</b> | <b>1.00-1.45</b> |
| N76 | Other inflammation of vagina and vulva          | 67  | 417   | 1.65  | 1.26-2.15   | 0.04                     | 1.23         | 0.92-1.64         | <b>2.04</b>  | <b>1.05-3.97</b>   | 1.23        | 0.93-1.63        |
| R00 | Abnormalities of heart beat                     | 32  | 127   | 2.57  | 1.73-3.80   | 0.0004                   | <b>1.94</b>  | <b>1.27-2.96</b>  | 1.13         | 0.46-2.79          | <b>1.95</b> | <b>1.29-2.95</b> |
| R07 | Pain in throat and chest                        | 168 | 1,091 | 1.64  | 1.37-1.95   | 6.21 x 10 <sup>-06</sup> | 1.13         | 0.93-1.38         | 1.12         | 0.73-1.72          | 1.16        | 0.96-1.41        |
| R10 | Abdominal and pelvic pain                       | 428 | 3,274 | 1.51  | 1.32-1.71   | 6.52 x 10 <sup>-08</sup> | 1.06         | 0.92-1.24         | <b>1.66</b>  | <b>1.21-2.28</b>   | 1.05        | 0.90-1.21        |
| R11 | Nausea and vomiting                             | 230 | 1,654 | 1.49  | 1.28-1.74   | 5.62 x 10 <sup>-05</sup> | 1.00         | 0.84-1.19         | 1.09         | 0.74-1.62          | 1.06        | 0.89-1.26        |
| R14 | Flatulence and related conditions               | 47  | 238   | 2.02  | 1.47-2.78   | 0.003                    | <b>1.43</b>  | <b>1.01-2.01</b>  | 1.86         | 0.81-4.27          | 1.38        | 0.99-1.93        |
| R20 | Disturbances of skin sensation                  | 78  | 56    | 14.92 | 10.52-21.16 | 0.0                      | <b>12.93</b> | <b>8.98-18.62</b> | <b>27.70</b> | <b>6.52-117.64</b> | -           | -                |
| R30 | Pain associated with micturition                | 34  | 161   | 2.15  | 1.48-3.13   | 0.01                     | 1.35         | 0.90-2.04         | 1.73         | 0.60-5.02          | 1.43        | 0.96-2.12        |
| R42 | Dizziness and giddiness                         | 143 | 673   | 2.29  | 1.89-2.78   | 0.0                      | <b>1.52</b>  | <b>1.22-1.89</b>  | 1.45         | 0.90-2.34          | -           | -                |
| R51 | Headache                                        | 332 | 2,349 | 1.59  | 1.39-1.83   | 3.86 x 10 <sup>-09</sup> | 1.04         | 0.89-1.22         | 1.19         | 0.86-1.65          | 1.12        | 0.96-1.30        |
| S80 | Superficial injury of lower leg                 | 90  | 604   | 1.53  | 1.22-1.93   | 0.04                     | 1.08         | 0.84-1.39         | 0.94         | 0.56-1.58          | 1.15        | 0.90-1.46        |

\* The p values were adjusted by the Šidák correction<sup>14</sup>.

\*\* Adjusted for sex, age and all other ICD codes in the table, significant findings in a multivariable analysis are in bold. A OR, adjusted odds ratio; AURI, acute upper respiratory infections; CI, confidence intervals; UOR, unadjusted odds ratio
