# Supplementary material for: Symptoms Prior to Diagnosis of Multiple Sclerosis in Individuals Younger Than 18 Years
Source: PubMed Central journal article supplement (PMC11681376; doi:10.1001/jamanetworkopen.2024.52652), 2024-12-27
Supplement: jamanetwopen-e2452652-s002.pdf [file jamanetwopen-e2452652-s002.pdf]

## Data Sharing Statement

Akmatov. Symptoms Prior to Diagnosis of Multiple Sclerosis in Individuals Younger Than 18 Years. *JAMA Netw Open*. Published December 27, 2024.

doi:10.1001/jamanetworkopen.2024.52652

### Data

**Data available:** No

### Additional Information

**Explanation for why data not available:** The datasets analysed during the current study are not publicly available due to data protection regulations by the German Social Security Code (Sozialgesetzbuch V).
